RESEARCH ARTICLE

# Obligatory Role of EP1 Receptors in the Increase in Cerebral Blood Flow Produced by Hypercapnia in the Mice

Ken Uekawa, Kenzo Koizumi, Jason Hwang, Nathalie Brunier, Yorito Hattori, Ping Zhou, Laibaik Park\*

Feil Family Brain and Mind Research Institute, Weill Cornell Medical College, New York, NY, 10065, United States of America

\* [lap2003@med.cornell.edu](mailto:lap2003@med.cornell.edu)

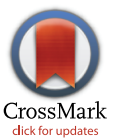

**OPEN ACCESS**

**Citation:** Uekawa K, Koizumi K, Hwang J, Brunier N, Hattori Y, Zhou P, et al. (2016) Obligatory Role of EP1 Receptors in the Increase in Cerebral Blood Flow Produced by Hypercapnia in the Mice. PLoS ONE 11(9): e0163329. doi:10.1371/journal.pone.0163329

**Editor:** Yen-Yu Ian Shih, University of North Carolina at Chapel Hill, UNITED STATES

**Received:** June 14, 2016

**Accepted:** September 7, 2016

**Published:** September 22, 2016

**Copyright:** © 2016 Uekawa et al. This is an open access article distributed under the terms of the [Creative Commons Attribution License](https://creativecommons.org/licenses/by/4.0/), which permits unrestricted use, distribution, and reproduction in any medium, provided the original author and source are credited.

**Data Availability Statement:** All relevant data are within the paper and its Supporting Information files.

**Funding:** This work was supported by the National Institutes of Health Grant NS37853, American Heart Association Grant 09SDG2060701. The generous support of the Feil Family Foundation is greatly acknowledged. The funders had no role in study design, data collection and analysis, decision to publish, or preparation of the manuscript.

## Abstract

Hypercapnia induces potent vasodilation in the cerebral circulation. Although it has long been known that prostanoids participate in the cerebrovascular effects of hypercapnia, the role of prostaglandin E2 (PGE<sub>2</sub>) and PGE<sub>2</sub> receptors have not been fully investigated. In this study, we sought to determine whether cyclooxygenase-1 (COX-1)-derived PGE<sub>2</sub> and EP1 receptors are involved in the cerebrovascular response induced by hypercapnia. Cerebral blood flow (CBF) was recorded by laser-Doppler flowmetry in the somatosensory cortex of anesthetized male EP1<sup>-/-</sup> mice and wild type (WT) littermates. In WT mice, neocortical application of the EP1 receptor antagonist SC-51089 attenuated the increase in CBF elicited by systemic hypercapnia (pCO<sub>2</sub> = 50–60 mmHg). SC-51089 also attenuated the increase in CBF produced by neocortical treatment of arachidonic acid or PGE<sub>2</sub>. These CBF responses were also attenuated in EP1<sup>-/-</sup> mice. In WT mice, the COX-1 inhibitor SC-560, but not the COX-2 inhibitor NS-398, attenuated the hypercapnic CBF increase. Neocortical application of exogenous PGE<sub>2</sub> restored the attenuation in resting CBF and the hypercapnic response induced by SC-560. In contrast, exogenous PGE<sub>2</sub> failed to rescue the attenuation both in WT mice induced by SC-51089 and EP1<sup>-/-</sup> mice, attesting to the obligatory role of EP1 receptors in the response. These findings indicate that the hypercapnic vasodilatation depends on COX-1-derived PGE<sub>2</sub> acting on EP1 receptors and highlight the critical role that COX-1-derived PGE<sub>2</sub> and EP1 receptors play in the hypercapnic regulation of the cerebral circulation.

## Introduction

Cerebral blood vessels are highly sensitive to changes in arterial partial pressure of carbon dioxide (pCO<sub>2</sub>). Hypercapnia is a potent vasodilator in the cerebrovascular microcirculation [1]. Even though many factors are likely involved in vasodilatation induced by hypercapnia [2–4], evidence suggests that prostanoids synthesized by cyclooxygenase (COX)-1 or -2 from arachidonic acid (AA) play a critical role in the hypercapnic response of the cerebral microcirculation. For example, inhibition of COX by indomethacin, an agent that inhibits both COX-1 and

**Competing Interests:** The authors have declared that no competing interests exist.

COX-2, attenuates the increase in CBF induced by hypercapnia [1, 5]. More recently, using the highly selective COX-1 inhibitor SC-560 and COX-1-null mice it was found that COX-1 is required for the cerebrovascular regulation induced by hypercapnia [6]. However, the pathway downstream of COX-1 driving vasodilation in response to hypercapnia is not well understood.

Recent findings suggest that prostaglandin E<sub>2</sub> (PGE<sub>2</sub>), the major prostanoid formed in microvessels [7], is implicated in the cerebrovascular regulation [8–10]. PGE<sub>2</sub> exerts its effect by acting on 4 G-protein coupled membrane receptors (EP1 through EP-4) [11]. Depending on the receptors PGE<sub>2</sub> acts on, it can induce either vasoconstriction or vasodilation. For example, when PGE<sub>2</sub> acts on EP1 receptors in perivascular nerves, it induces vasodilation [12]. Furthermore, EP1 receptors in cerebral endothelial cells have been implicated in the cerebrovascular effects of hypertension [13, 14]. However, it is unknown whether PGE<sub>2</sub> acting on EP1 receptors play a role in the regulation of cerebrovascular response evoked by hypercapnia.

In the present study, we sought to determine whether COX-1-derived PGE<sub>2</sub> and EP1 receptors are involved in the cerebrovascular response induced by hypercapnia. Using pharmacological probes and EP1 null mice, we found that the hypercapnic vasodilatation in the somatosensory cortex depends on COX-1-derived PGE<sub>2</sub> acting on EP1 receptors. Therefore, the findings highlight the critical role that COX-1 derived prostanoids and EP1 receptors play in the regulation of the cerebral circulation.

## Materials and Methods

### 1. Mice

All experimental procedures were approved by the Institutional Animal Care and Use Committee of Weill Cornell Medical College. Experiments were performed in 3–4 months old male mice. PGE<sub>2</sub> EP1-deficient mice were obtained from our in-house colony and were congenic with the C57BL/6 strain [15]. C57BL/6 mice were obtained from the Jackson Laboratory and used for wild types control.

### 2. General surgical procedures

Procedures for surgical preparation of the mice have been described previously in detail [16–18] and are only summarized here. Mice were anesthetized with isoflurane (induction: 5%; maintenance: 1–2%). One of the femoral arteries was randomly selected and cannulated for recording of arterial pressure and collection of blood samples. Mice were intubated and artificially ventilated with an oxygen-nitrogen mixture adjusted to provide an arterial pO<sub>2</sub> (pO<sub>2</sub>) of 120–140 mmHg (S1–S7 Tables). Rectal temperature was maintained at 37°C using a thermostatically controlled rectal probe connected to a heating pad. After surgery, isoflurane was gradually discontinued and anesthesia was maintained with urethane (750 mg/kg; i.p.) and  $\alpha$ -chloralose (50 mg/kg; i.p.). Throughout the experiment, the level of anesthesia was monitored by testing corneal reflexes and motor responses to tail pinch.

### 3. Monitoring of cerebral blood flow

A small craniotomy (2x2 mm) was performed to expose the somatosensory cortex. The dura was removed, and the site was superfused with a modified Ringer's solution (37° C; pH: 7.3–7.4)(see [19] for composition). CBF was continuously monitored at the site of superfusion with a laser-Doppler probe (Vasamedic, St. Paul, MN) positioned stereotaxically on the neocortical surface and connected to a computerized data acquisition system. Resting CBF values were recorded by the laser-Doppler probe and presented as raw data in laser-Doppler perfusion units (LDU). CBF values were expressed as percent increase relative to the resting level. Zero

values for CBF were obtained after the heart was stopped by an overdose of isoflurane at the end of the experiment.

#### 4. Immunofluorescent staining and confocal microscopy

Anesthetized mice were perfused transcardially with heparinized saline, followed by 4% (wt/vol) paraformaldehyde [17, 18]. Brains were taken, postfixed overnight in the same fixative, and cut in 40  $\mu$ m thickness. Brain sections were randomly selected and processed for labeling COX-1 (1:100; Cayman Chemicals) or EP1 (1:100; Cayman Chemicals) with endothelial cells (anti-platelet endothelial adhesion molecule-1 (anti-PECAM-1 or anti-CD31, 1:50; BD Biosciences), neurons (anti-neuronal nuclei, anti-Neun; Chemicon International), astrocytes (anti-GFAP, 1:1000; Sigma), or microglia (anti-ionized calcium-binding adaptor molecule 1, anti-Iba1; 1:500; Wako Chemicals). Then, sections were incubated with a FITC or a Cy5-conjugated secondary antibody (1:200, Jackson ImmunoResearch Laboratories) and mounted on slides. The specificity of the labeling was established by omitting the primary antibody or by preabsorption with the antigen. Images were obtained using a confocal laser scanning microscope (Leica SP5) in somatosensory cortex underlying the cranial window (0.38 to  $-1.94$  mm from Bregma). Brain sections from EP1<sup>-/-</sup> mice and WT littermates were processed under identical conditions and imaged using identical settings. CD31-positive vascular profiles (the number of and the % area occupied by the profiles) and COX-1 immunoreactivity were quantified using ImageJ (National Institutes of Health).

#### 5. Experimental protocol

CBF recordings were started after arterial pressure and blood gases were in a steady state (S1–S7 Tables). The cranial window was superfused with Ringer's solution. CBF responses to whisker stimulation were recorded while gently stroking the whiskers with a cotton-tipped applicator for 60 sec. The endothelium (EC)-dependent vasodilator acetylcholine (10  $\mu$ M; Sigma), endothelial nitric oxide synthase (eNOS)-dependent vasodilator [1], or A23187 (3  $\mu$ M; Sigma), COX-1-dependent vasodilator [6], was topically superfused for 3–5 min and the evoked CBF increases recorded. CBF responses to adenosine (400  $\mu$ M; Sigma), agents that produce vasodilation by acting directly on vascular smooth muscles [1], were also tested. The increase in CBF produced by hypercapnia was examined by introducing 5% CO<sub>2</sub> in the ventilator to increase arterial pCO<sub>2</sub> up to 50–60 mmHg. In the previous studies, this level of pCO<sub>2</sub> was found to increase PGE<sub>2</sub> release that induces vasodilation of cerebral arterioles [20–22]. Once a stable increase in CBF was obtained for 3–5 min, pCO<sub>2</sub> was returned to normocapnia. All pharmacological agents were dissolved in a modified Ringer's solution, unless otherwise written.

**a. Dose response effect of the EP1 inhibitor SC-51089 on cerebrovascular responses induced by hypercapnia in WT and EP1<sup>-/-</sup> mice.** In WT mice, after testing baseline CBF response to hypercapnia, acetylcholine, A23187, or adenosine, the superfusion solution was switched to Ringer's containing the EP1 receptor inhibitor SC-51089 (8-chlorodibenz[1,4]oxazepine-10(11H)-carboxylic acid; 2-[1-oxo-3-(3-pyridinyl)propyl]hydrazide (Biomol) [23]. SC-51089 was dissolved in dimethylsulfoxide (DMSO), diluted with Ringer's to the desired concentration and superfused on the somatosensory cortex. The final DMSO concentration was <0.2% in all the experiments, which does not affect the cerebrovascular responses tested [24]. The following SC-51089 concentrations were tested: 1, 10, or 100  $\mu$ M. Thirty to 40 minutes later, blood pressure and resting CBF were recorded, and CBF responses to hypercapnia, acetylcholine, A23187, or adenosine were examined again. In the previous experiments, we and others established that the CBF response to hypercapnia is stable over the duration of the experiments [25–27]. In EP1<sup>-/-</sup> mice, CBF response to whisker stimulation, acetylcholine, adenosine, A23187, or hypercapnia was examined with or without application of SC-51089. The

effect of SC-51089 on CBF response produced by whisker stimulation was tested in a separate group of mice because hypercapnia affects the CBF response to whisker stimulation [25].

**b. Effect of the EP3 inhibitor L-798,106 or the EP4 inhibitor ONO-AE3-208 on the cerebrovascular responses induced by hypercapnia in WT mice.** After the baseline CBF responses were established, the superfusion solution was switched to Ringer's containing the EP3 inhibitor L-798,106 (thiophene-2-sulphonic acid {3-[2-(4-methylsulphonylbenzyl)-phenyl]-acryloyl}-amide, 1 μM; Tocris) [28] or the EP4 inhibitor ONO-AE3-208 (4-{4-Cyano-2-[2-(4-fluoronaphthalen-1-yl) propionylamino] phenyl} butyric acid, 1 μM; Tocris) [29, 30]. L-798,106 or ONO-AE3-208 was dissolved in DMSO and diluted with Ringer's. The CBF responses to hypercapnia, whisker stimulation, acetylcholine, and adenosine were tested again 30–40 minutes later (see above).

**c. Effect of the COX-1 inhibitor SC-560 with or without PGE2 or the COX-2 inhibitor NS-398 on the cerebrovascular responses induced by hypercapnia in WT mice.** After the baseline CBF responses were established, the superfusion solution was switched to Ringer's containing the COX-1 inhibitor SC-560 ([5-(4-chlorophenyl)-1-(4-methoxyphenyl)-3-trifluoromethylpyrazole], 25 μM) or the COX-2 inhibitor NS398 (N[2-(cyclohexyloxy)-4-nitrophenyl]-methanesulfonamide) (100 μM, Biomol) [6, 31]. SC-560 or NS-398 was dissolved in DMSO and diluted with Ringer's. The CBF responses to hypercapnia (pCO<sub>2</sub> = 50-60mmHg), acetylcholine, A23187, or adenosine were tested again 30–40 minutes later. The effect of SC-560 or NS-398 on CBF response produced by whisker stimulation was tested in a separate group of mice (see above).

**d. Effect of SC-51089 on the cerebrovascular responses induced by arachidonic acid or PGE2.** In these studies, the effect of a half maximal concentration of SC-51089 (10 μM) was tested on the vasodilation induced by neocortical superfusion of arachidonic acid (AA) or PGE<sub>2</sub>. After the baseline responses to hypercapnia, acetylcholine and adenosine were established, SC-51089 (10 μM) was superfused over the somatosensory cortex for 30–40 minutes and the CBF responses to the neocortical superfusion of different concentrations of AA (0.5, 1, 10, and 100 μM) or PGE<sub>2</sub> (1, 5, 10, 20, 50, and 100 μM) were tested.

**e. Effect of PGE2 on the attenuation of the hypercapnic vasodilation by SC-560 or SC-51089 in WT mice.** The reactivity of CBF to hypercapnia (pCO<sub>2</sub> = 50-60mmHg) was established first. Then, the superfusion solution was switched to Ringer's containing SC-560 (25 μM) or SC-51089 (10 μM) and 30–40 minutes later the response to hypercapnia was tested again. Subsequently, superfusate was switched to Ringer's containing SC-560 or SC-51089 with an sub-effective doses of PGE<sub>2</sub> (1 μM) (see Table 1) and the response to hypercapnia was tested again 30–40 minutes later.

**Table 1. CBF increases induced by AA or PGE<sub>2</sub>.**

|                  | Dose (μM) | EP1 <sup>+/+</sup> |          | EP1 <sup>-/-</sup> | N |
|------------------|-----------|--------------------|----------|--------------------|---|
|                  |           | Vehicle            | SC-51089 | Vehicle            |   |
| AA               | 0.5       | 6±1                | 3±1*     | 3±1*               | 5 |
|                  | 1         | 12±1               | 6±1*     | 7±1*               | 5 |
|                  | 10        | 20±2               | 9±1*     | 9±3*               | 5 |
|                  | 100       | 39±5               | 16±1*    | 19±3*              | 5 |
| PGE <sub>2</sub> | 1         | 1±1                | 1±1      | 1±1                | 5 |
|                  | 5         | 9±2                | 5±1*     | 4±1*               | 5 |
|                  | 10        | 16±2               | 10±2*    | 8±2*               | 5 |
|                  | 20        | 20±3               | 13±2*    | 14±2*              | 5 |
|                  | 50        | 24±4               | 13±2*    | 17±1*              | 5 |

Values (%) are means±SEM; AA, arachidonic acid; CBF, cerebral blood flow; N, number of mice; SC-51089, 10 μM

\*, p<0.05 from vehicle-treated EP1<sup>+/+</sup>.

doi:10.1371/journal.pone.0163329.t001

## 6. Data analysis

Mice were randomly assigned to treatment with inhibitors or vehicle. Data in text and figures were analyzed with Prism 7 (Version 7.0a; GraphPad Software) and are expressed as means  $\pm$  SEM. Two-group comparisons were analyzed by the two-tailed t-test for dependent or independent samples, as appropriate. Multiple comparisons were evaluated by the analysis of variance (ANOVA) and Tukey's test. When necessary, non parametric Mann Whitney test was employed to reinforce statistical power for the sample size of  $N = 5/\text{group}$ . Statistical significance was taken for probability values of less than 0.05.

## Results

### PGE<sub>2</sub> EP1 receptors are required for the increase in CBF induced by hypercapnia

In WT mice, neocortical application of the EP1 receptor inhibitor SC-51089 (1–100  $\mu\text{M}$ ) attenuated the increase in CBF induced by hypercapnia ( $\text{pCO}_2 = 50\text{--}60$  mmHg) (Fig 1A). The effect reached a plateau at a concentration of 10  $\mu\text{M}$  (vehicle,  $69\pm 5\%$ ; SC-51089,  $41\pm 3\%$ ;  $-41\pm 4\%$ ;  $p < 0.05$ ; ANOVA; Fig 1A), which was subsequently used to assess the role of EP1 receptors in the hypercapnic cerebrovascular response. In contrast, SC-51089 did not affect resting CBF or the CBF increase evoked by neocortical application of acetylcholine, the  $\text{Ca}^{2+}$  ionophore A23187 or adenosine ( $p > 0.05$ ; Fig 1B–1E). Similarly, SC-51089 (1–100  $\mu\text{M}$ ) did not affect the increase in CBF produced by whisker stimulation ( $p > 0.05$ ; Fig 1F). Neither EP3 (L-798,106) nor EP4 receptor (ONO-AE3-208) inhibitor, however, affected these CBF responses ( $p > 0.05$ ; S1 and S2 Figs). In agreement with these pharmacological data, in EP1<sup>-/-</sup> mice the increase in CBF evoked by hypercapnia ( $\text{pCO}_2 = 50\text{--}60$  mmHg) was also attenuated ( $p < 0.05$ ; Fig 2A), whereas the CBF response produced by acetylcholine, A23187, adenosine, or whisker stimulation was not affected ( $p > 0.05$ ; Fig 2B). These effects could not be attributed to alterations in vascular structure in the null mice since the number and morphology of cerebral blood vessels in the somatosensory cortex of EP1<sup>-/-</sup> did not differ from WT mice ( $p > 0.05$ ; Fig 3A and 3B).

### Role of COX-1-derived PGE<sub>2</sub> in the increase in CBF induced by hypercapnia

The finding that PGE<sub>2</sub> EP1 receptors are needed for the CBF response to hypercapnia ( $\text{pCO}_2 = 50\text{--}60$  mmHg) suggests the involvement of the COX-derived prostanoid PGE<sub>2</sub> [11, 32]. Therefore, we next determined the source of PGE<sub>2</sub>: COX-1 or COX-2. In agreement with previous studies [6], neocortical superfusion of the COX-1 inhibitor SC-560 attenuated the increase in CBF evoked by hypercapnia (vehicle,  $62\pm 5\%$ ; SC-560,  $31\pm 5\%$ ;  $-50\pm 5\%$ ;  $p < 0.05$ ; Fig 4A) or the  $\text{Ca}^{2+}$  ionophore A23187 ( $-37\pm 1\%$ ;  $p < 0.05$ ; Fig 4B) and also reduced resting CBF ( $-22\pm 1\%$ ;  $p < 0.05$ ; Fig 4C). However, SC-560 did not affect the increase in CBF induced by acetylcholine, adenosine, or whisker stimulation ( $p < 0.05$ ; Fig 4B). In contrast, the COX-2 inhibitor NS-398 did not alter resting CBF or CBF response to hypercapnia, acetylcholine, A23187 or adenosine ( $p > 0.05$ ; Fig 4A–4C), but it attenuated the increase in CBF induced by whisker stimulation ( $-35\pm 1\%$ ;  $p < 0.05$ ; Fig 4B), as demonstrated previously [31]. These findings indicate that COX-1-derived PGE<sub>2</sub> plays a critical role in the hypercapnic increase in CBF.

### Cellular identification of COX-1 and EP1 receptors in EP1<sup>+/+</sup> and in EP1<sup>-/-</sup> mice

In the somatosensory cortex of EP1<sup>-/-</sup> and WT littermates, COX-1 immunoreactivity was localized in CD31<sup>+</sup> blood vessels and Iba1<sup>+</sup> microglia and its immunoreactivity levels were similar

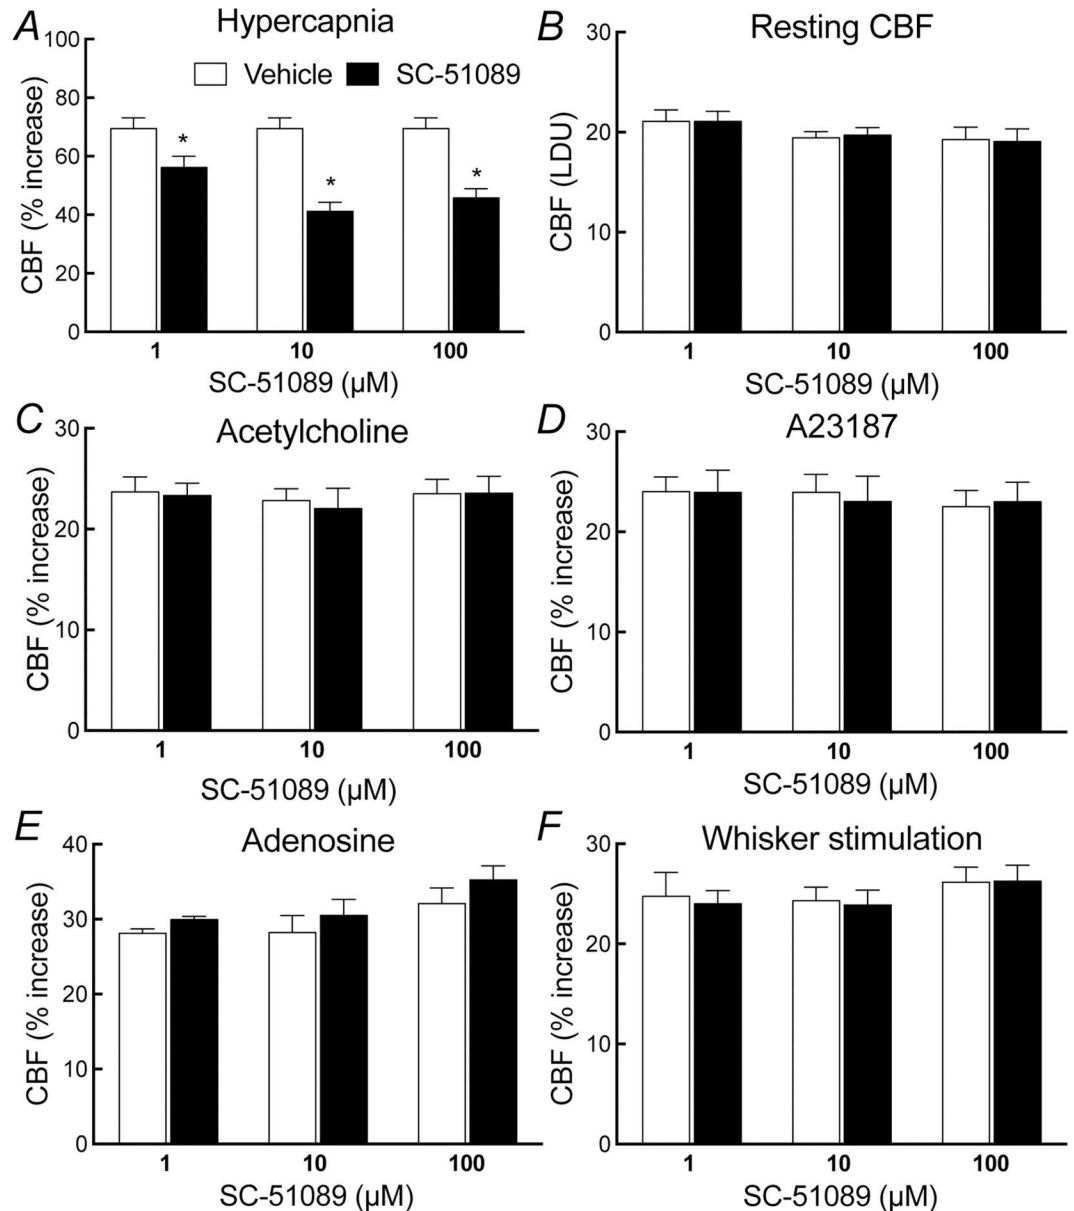

**Fig 1. Effect of the EP1 receptor inhibitor SC-51089 on the increase in CBF induced by hypercapnia (A), resting CBF (B), and on the increase in CBF induced by acetylcholine (C), A23187 (D), adenosine (E), or whisker stimulation (F) in wild-type mice.** LDU, laser-Doppler perfusion units; \*  $p < 0.05$  from vehicle, analysis of variance and Tukey's test;  $n = 5/\text{group}$ .

doi:10.1371/journal.pone.0163329.g001

( $p > 0.05$ ; Fig 3A and 3C & S3 Fig). In contrast, COX-1 immunoreactivity was not observed in neurons (Neun<sup>+</sup>) or astrocytes (GFAP<sup>+</sup>) (S4A and S4B Fig). Immunoreactivity of EP1 receptors was detected in CD31<sup>+</sup> cerebral microvessels and Neun<sup>+</sup> neurons (Fig 5 and S5A Fig). EP1 receptor immunoreactivity was not detected in microglia (Iba1<sup>+</sup>) or astrocytes (GFAP<sup>+</sup>) (S5B and S5C Fig). Furthermore, in EP1<sup>-/-</sup> mice EP1 receptor immunoreactivity was negative (Fig 5 & S5A–S5C Fig). Taken together, the data suggest that COX-1 is expressed in endothelial cells and microglia, while EP1 receptors are expressed in endothelial cells and neurons.

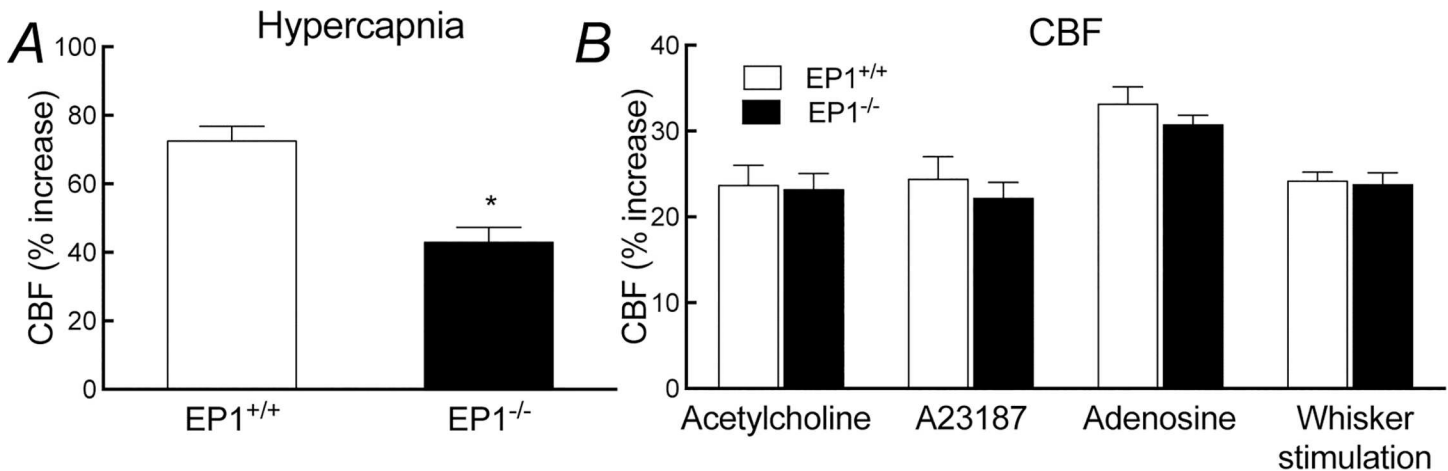

**Fig 2. Cerebrovascular responses in EP1<sup>-/-</sup> mice.** A, increase in CBF produced by hypercapnia; B, CBF response produced by acetylcholine, A23187, adenosine, or whisker stimulation. \*  $p < 0.05$ , paired t-test;  $n = 5$ /group.

doi:10.1371/journal.pone.0163329.g002

### Cerebrovascular responses to exogenous AA and PGE<sub>2</sub> in EP1<sup>+/+</sup> mice treated with SC-51089 and in EP1<sup>-/-</sup> mice

PGE<sub>2</sub> is synthesized from AA through enzymatic steps involving COX [11, 32]. The data presented above implicate COX-1 in the increase in CBF produced by hypercapnia. Next, we sought to determine the effect of SC-51089 (10 μM) on the CBF increase induced by neocortical application of AA (0.5–100 μM) or PGE<sub>2</sub> (1–50 μM). In EP1<sup>+/+</sup> mice, neocortical superfusion of AA increased CBF dose-dependently ( $p < 0.05$ ; Table 1). Neocortical application of PGE<sub>2</sub> also increased CBF ( $p < 0.05$ ; Table 1), but at concentrations above 1 μM ( $p > 0.05$ ; Table 1). The CBF response to AA [AA (10 μM),  $20 \pm 2\%$ ; AA+SC-51089,  $9 \pm 1\%$ ;  $-55\%$ ;  $p < 0.05$ ] and PGE<sub>2</sub> [PGE<sub>2</sub> (10 μM),  $16 \pm 2\%$ ; PGE<sub>2</sub>+SC-51089,  $10 \pm 2\%$ ;  $-38\%$ ;  $p < 0.05$ ] were attenuated by neocortical application of SC-51089 (10 μM) (see Table 1). In the EP1<sup>-/-</sup> mice, the CBF increase induced by AA or PGE<sub>2</sub> were also attenuated, a reduction comparable to that observed in SC-51089-treated EP1<sup>+/+</sup> mice (see Table 1). These findings implicate EP1 receptors in the cerebrovascular responses induced by AA or PGE<sub>2</sub>.

### Effect of exogenous PGE<sub>2</sub> on the attenuation of the hypercapnic vasodilation by SC-560 or SC-51089

In these experiments, the effect of PGE<sub>2</sub> on the attenuation of the hypercapnic response by SC-560 or SC-51089 was examined. On the basis of a dose response study (see Table 1), we selected a concentration of PGE<sub>2</sub> (1 μM) that does not alter CBF. In WT mice, neocortical application of this concentration of PGE<sub>2</sub> alone did not affect resting CBF or hypercapnic response, but completely restored the attenuation in resting CBF or hypercapnic response induced by SC-560 (25 μM) ( $p > 0.05$ ; Fig 6A and 6B). In contrast, PGE<sub>2</sub> failed to reestablish the attenuation in the hypercapnic CBF response induced by SC-51089 (10 μM) ( $p < 0.05$ ; Fig 6B), indicating a role that EP1 receptors play in mediating the hypercapnic CBF effect of COX-1-derived PGE<sub>2</sub> is obligatory. Consistent with these pharmacological data, PGE<sub>2</sub> had no effect in EP1<sup>-/-</sup> mice (Fig 6A and 6B).

### Discussion

We have demonstrated that PGE<sub>2</sub> EP1 receptors are critical for the increase in CBF induced by systemic hypercapnia. Specifically, we found that SC-51089, not L-798,206 or ONO-AE3-208,

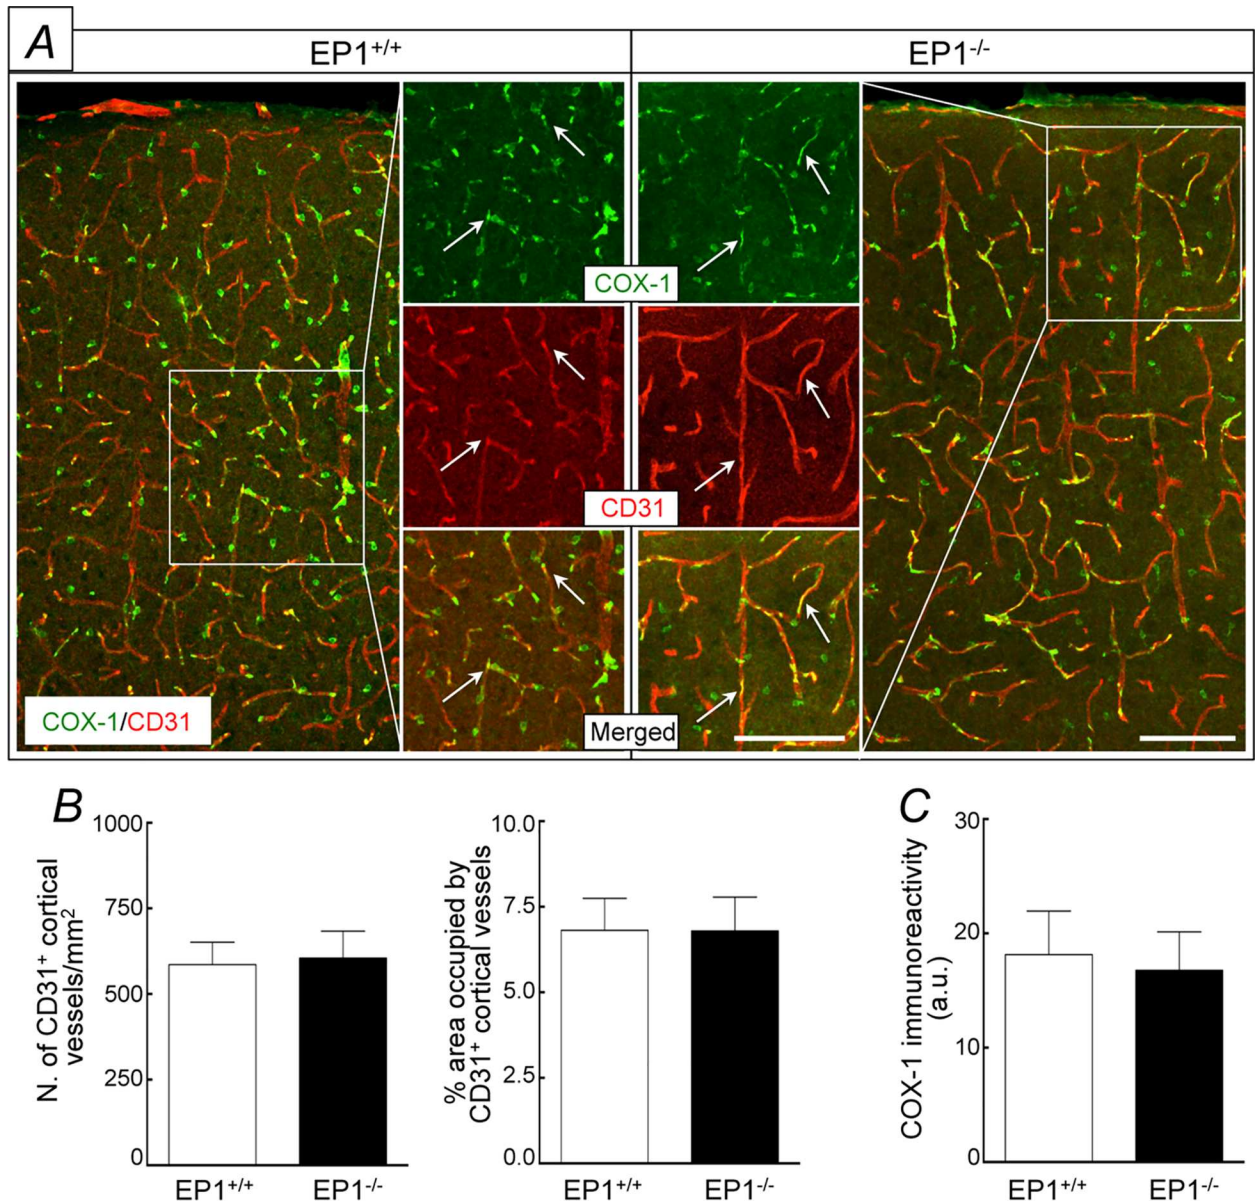

**Fig 3. Blood vessel profiles and COX-1 expression in the somatosensory cortex of EP1<sup>+/+</sup> and EP1<sup>-/-</sup> mice.** A, COX-1 immunoreactivity (green) is co-localized with the endothelial cell marker CD31 (red) both in EP1<sup>+/+</sup> and EP1<sup>-/-</sup> mice. B, number of CD31-positive neocortical blood vessels and % area occupied by the blood vessels do not differ between EP1<sup>+/+</sup> and EP1<sup>-/-</sup> mice. C, quantification of COX-1 immunoreactivity is similar between EP1<sup>+/+</sup> and EP1<sup>-/-</sup> mice. A.u., arbitrary unit; scale bar: 100 μm; n = 5/group.

doi:10.1371/journal.pone.0163329.g003

attenuate the increases in CBF induced by hypercapnia, AA, or PGE<sub>2</sub>. In contrast, the increase in CBF induced by acetylcholine, A23187, adenosine, or whisker stimulation is not affected. These findings were further supported by corresponding observations in mice lacking EP1 receptor [15]. As shown previously, the COX-1 inhibitor SC-560 also reduced the hypercapnic response, whereas the COX-2 inhibitor NS-398 had no effect, pointing to COX-1 as a major enzyme in the effect. Accordingly, PGE<sub>2</sub> counteracted the effect of SC-560 in attenuating the hypercapnic response in WT mice, attesting the participation of COX-1-derived PGE<sub>2</sub>. In contrast, PGE<sub>2</sub> failed to counteract the effect of SC-51089, suggesting an obligatory role that EP1 receptors play in the hypercapnic responses. The morphology and number of cerebral blood



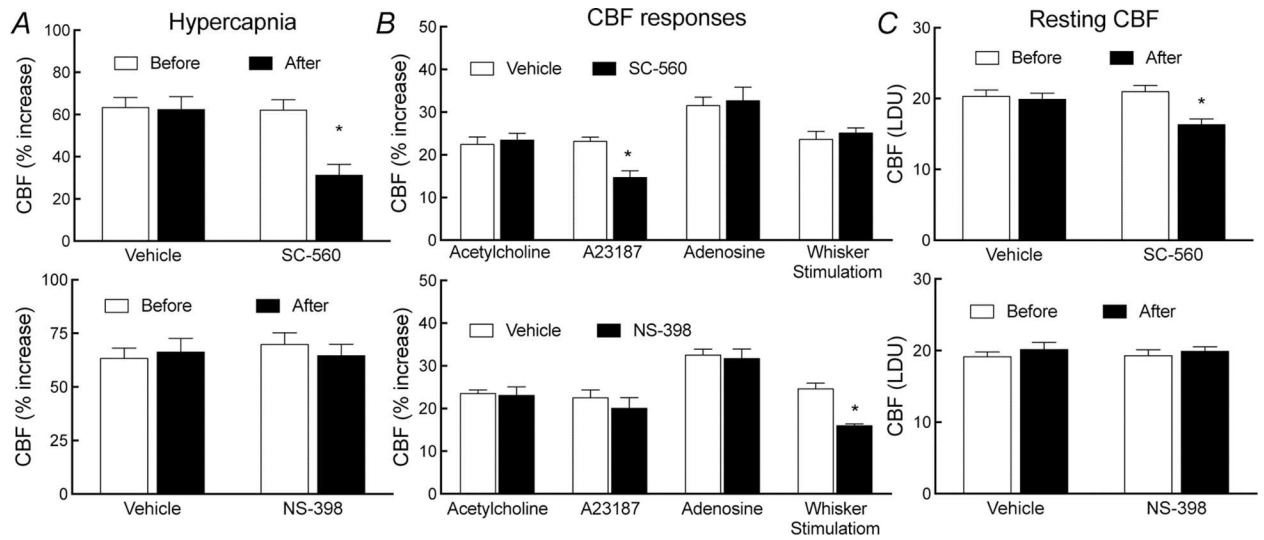

**Fig 4. Effect of SC-560 or NS-398 on (A) the increase in CBF elicited by hypercapnia, (B) resting CBF, or (C) CBF response to acetylcholine, A23187, adenosine, or whisker stimulation in wild-type mice.** LDU, laser-Doppler perfusion units. \* $p < 0.05$  paired t-test;  $n = 5$ /group.

doi:10.1371/journal.pone.0163329.g004

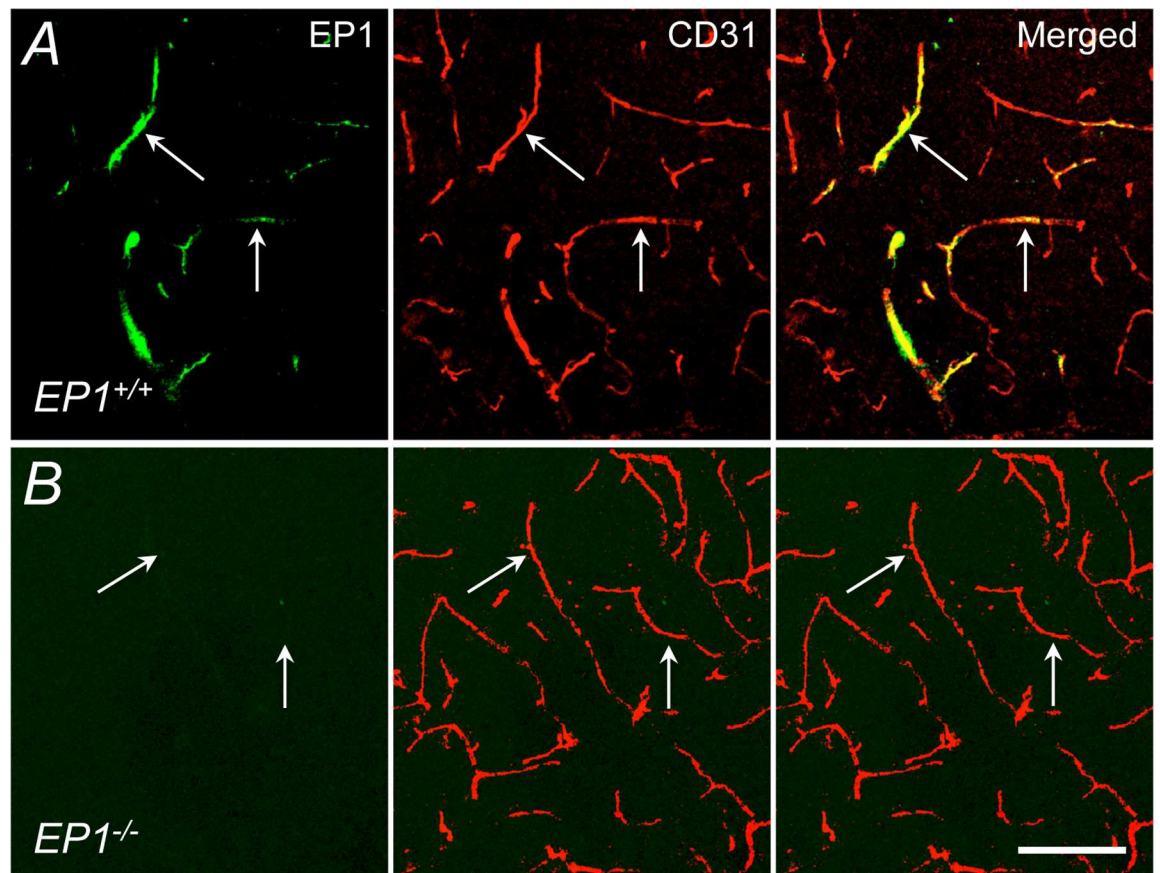

**Fig 5. EP1 receptor immunoreactivity in CD31-positive microvessels of the somatosensory cortex.** EP1 receptor immunoreactivity (green) is colocalized with CD31<sup>+</sup> cortical vessels (red, arrows) in EP1<sup>+/+</sup> (A), but barely detectable in EP1<sup>-/-</sup> (B) mice. Scale bar, 100  $\mu$ m.

doi:10.1371/journal.pone.0163329.g005

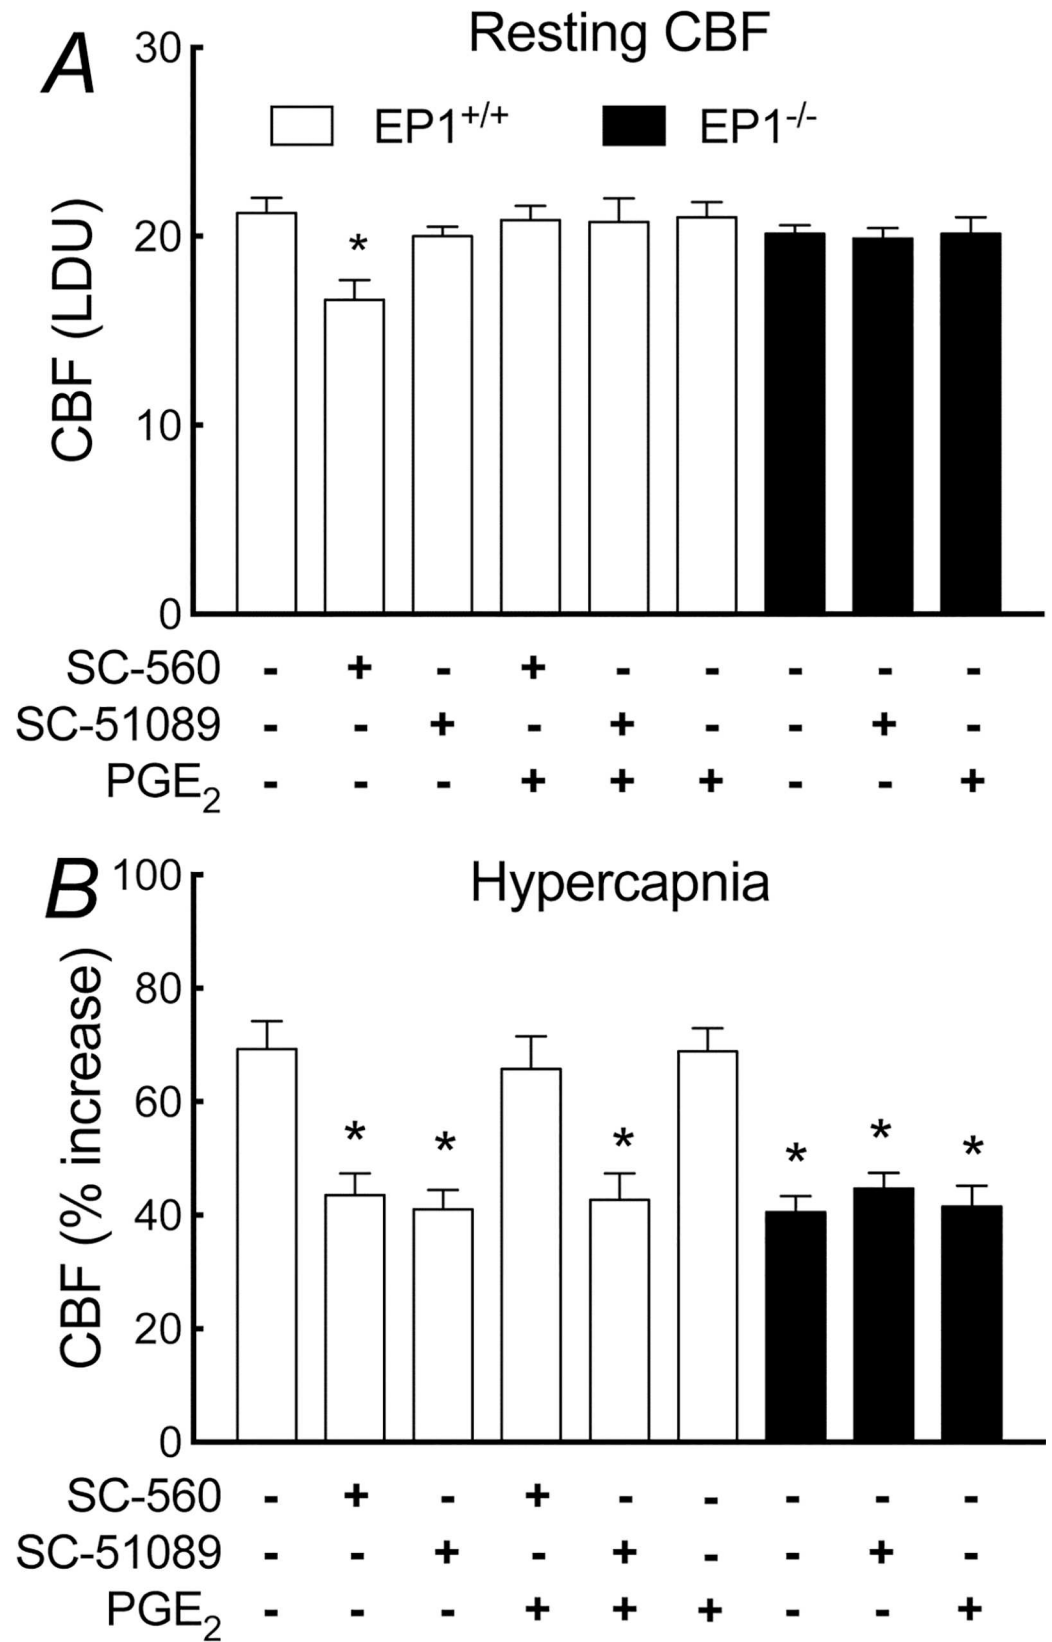

**Fig 6. Effect of SC-560 or SC-51089 with or without PGE<sub>2</sub> on resting CBF (A) and the increase in CBF elicited by hypercapnia (B) in EP1<sup>-/-</sup> and wild-type littermates.** LDU, laser-Doppler perfusion units; \*  $p < 0.05$  from no treatment, analysis of variance and Tukey's test;  $n = 5/\text{group}$ .

doi:10.1371/journal.pone.0163329.g006

vessels in the somatosensory cortex was comparable between EP1 null and WT control. Using immunofluorescent stainings to investigate the cellular locations of COX-1 and PGE<sub>2</sub> EP1 receptors, we found COX-1 in endothelial cells and microglia and EP1 receptors in endothelial cells and neurons. These observations provide the first demonstration that EP1 receptors play an obligatory role in mediating the hypercapnic vasodilatory effect of COX-1-derived PGE<sub>2</sub>.

The cerebrovascular effects of pharmacological agents used can not be attributed to non-pharmacological effects causing vascular damage or to a gradual deterioration of the experimental preparation because the agents were selectively effective. For example, SC-51089 affected only the hypercapnic response or the CBF response to AA or PGE<sub>2</sub>, but it did not alter the CBF response to acetylcholine, A23187, adenosine, or whisker stimulation. As shown previously [6], SC-560 attenuated resting CBF or the response to hypercapnia or A23187 but not to acetylcholine or adenosine. Furthermore, NS-398 affected only whisker stimulation, but did not impact on other responses. Nevertheless, our findings clearly establish a role that PGE<sub>2</sub> EP1 receptors play in the cerebrovascular responses induced by hypercapnia.

Pharmacological inhibition or genetic ablation of EP1 receptors specifically reduces the hypercapnic response. The mechanistic pathways leading to the increase in CBF evoked by hypercapnia rely on not only vascular but also parenchymal factors [1, 32]. One of the major pathways includes the effect of acidosis on smooth muscle cells in brain blood vessels [2, 33], but many other factors derived from inside or outside of the blood vessel walls also contribute to this response. For example, a certain level of prostanoids is required for the hypercapnic response to occur [21], an effect implicating as a permissive factor but not as an active participant. Our findings that PGE<sub>2</sub> does not affect resting CBF, but reestablishes the attenuation in resting CBF or hypercapnic response by SC-560 could suggest that PGE<sub>2</sub> acts as one of the permissive factors. Interestingly, we found that PGE<sub>2</sub> fails to reestablish the attenuation in hypercapnic vasodilation by SC-51089. This observation suggests that COX-1 is the source of prostanoids mediating resting cerebrovascular tone that does not require a role of PGE<sub>2</sub> (EP1/EP3/EP4) receptors. With regard to the COX-1 by-products, PGE<sub>2</sub> and prostacyclin (PGI<sub>2</sub>) are vasoactive [32, 34] and could be the mediator of resting CBF. However, the exact reaction products of COX-1 involved in the resting CBF remain to be determined. Taken together, the finding that the hypercapnic response is attenuated both in WT mice by acute inhibition of EP1 receptors and in EP1 null mice suggests the possibility that EP1 receptors are required for the hypercapnic response and, consequently, cannot be taken over.

The observation that EP1 receptors are required for the hypercapnic response implicates PGE<sub>2</sub> in the response. PGE<sub>2</sub> is a prostanoid synthesized by the COX pathway from AA. As anticipated [6], we found that SC-560, not SC-398, attenuates the increase in CBF evoked by hypercapnia, a finding indicating COX-1 as a synthesizing enzyme of PGE<sub>2</sub>. We found that COX-1 is localized to the wall of brain blood vessels and microglia in the somatosensory cortex, which is congruent with previous findings [14, 35]. The previous study that the effect of the nonselective COX inhibitor indomethacin on the hypercapnic increase in CBF is reversed by PGE<sub>2</sub> [21] raises the possibility that this prostanoid exerts the downstream vascular effects of COX-1. Indeed, this possibility is supported by our finding that exogenous PGE<sub>2</sub> reestablishes the attenuation of the hypercapnic response in WT mice induced by SC-560 but not by SC-51089. This observation indicates that in the inhibition of COX-1 PGE<sub>2</sub> is able to counteract the attenuation, but in the absence of EP1 receptors it is ineffective. These findings provide

additional evidence that COX-1 plays a distinct role as a source of PGE<sub>2</sub> actuating the role of EP1 receptors in the hypercapnic vasodilation.

The present findings that PGE<sub>2</sub> does not rescue the attenuation in the hypercapnic response if EP1 receptors are inhibited provide evidence that only EP1 receptors, and not other prostanoïd receptors, are involved in the response. We found that EP1 receptors are localized to the endothelial cells of brain blood vessels and neurons, but not microglia, in the somatosensory cortex. However, we cannot rule out that microglial EP1 is expressed below immunocytochemical detection levels in resting state, but it becomes detectable in activated state [36, 37]. The actions of EP1 receptors are coupled to intracellular Ca<sup>2+</sup> signalling [12, 15], a mechanism that is usually associated with hypertension [13, 14], ischemic brain injuries and associated blood flow responses [15, 38] or hemodynamic responses [10, 12]. Thus, the activation of EP1 receptors and its downstream pathways might determine pathophysiological consequences. In contrast, the role of EP1 receptors in the hypercapnic response, to the best of our knowledge, has never been investigated. The observation that SC-51089 reduces the hypercapnic response in WT mice but does not in EP1 nulls provides a specificity for our findings that EP1 receptors are implicated in the response. We also found that EP3 or EP4 receptors are not involved in the hypercapnic CBF responses. These results are incongruent with a few studies [9, 10, 38] showing that EP1 and EP3 receptors are vasoconstrictory and EP4 receptors vasodilatory. The reasons for this disparity are not clear, although compounding effects of experimental conditions (*in vitro* vs *in vivo*), animal species (porcine vs murine), or pathophysiological conditions could play a role. Nonetheless, considering that EP1 receptors can increase intracellular Ca<sup>2+</sup> [12, 15, 32, 38], their activation may be required to promote the intracellular Ca<sup>2+</sup> necessary for activating the hypercapnic response. This possibility is supported by recent studies that Ca<sup>2+</sup> dynamics contribute to vasodilation induced by PGE<sub>2</sub> in the porcine cerebral arteries [12]. Taken together, our data suggest the possibility that EP1 receptor-mediated Ca<sup>2+</sup> dynamics serve to “prime” the hypercapnic response by activating other enzymes, such as NOS or COX, involved in an obligatory role.

In conclusion, we have demonstrated that PGE<sub>2</sub> EP1 receptors are required for the cerebrovascular response to hypercapnia, but are not involved in maintaining resting CBF or the CBF increase induced by acetylcholine, A23187, adenosine, or whisker stimulation. Consequently, EP1 null mice displayed reduced hypercapnic response similar to those observed in WT mice treated with SC-51089. In addition, findings with exogenous PGE<sub>2</sub> indicated that COX-1-derived PGE<sub>2</sub> is involved in the hypercapnic response. These findings indicate that the hypercapnic vasodilatation depends on COX-1-derived PGE<sub>2</sub> acting on EP1 receptors and highlight the critical role that COX-1-derived PGE<sub>2</sub> and EP1 receptors play in the hypercapnic response of the cerebral circulation.

## Supporting Information

**S1 Fig. Effect of the EP3 receptor inhibitor L-798,106 on the increase in CBF induced by hypercapnia (A), resting CBF (B), and on the increase in CBF induced by acetylcholine, adenosine, or whisker stimulation (C) in wild-type mice.** LDU, laser-Doppler perfusion units; n = 5/group.  
(TIF)

**S2 Fig. Effect of the EP4 receptor inhibitor ONO-AE3-208 on the increase in CBF induced by hypercapnia (A), resting CBF (B), and on the increase in CBF induced by acetylcholine, adenosine, or whisker stimulation (C) in wild-type mice.** LDU, laser-Doppler perfusion units; n = 5/group.  
(TIF)

**S3 Fig. COX-1 expression in the somatosensory cortex of EP1<sup>+/+</sup> and EP1<sup>-/-</sup> mice.** COX-1 immunoreactivity (green) is co-localized with the microglial marker ionized calcium-binding adaptor molecule 1 Iba1 (green) both in EP1<sup>+/+</sup> and EP1<sup>-/-</sup> mice. Scale bar: 100  $\mu$ m; representative pictures from n = 4/group.

(TIF)

**S4 Fig. COX-1 expression in neurons and astrocytes of the somatosensory cortex of EP1<sup>+/+</sup> and EP1<sup>-/-</sup> mice.** COX-1 immunoreactivity (green) is not co-localized with the neuronal marker Neun (red, A) or the astrocytic marker GFAP (red, B) both in EP1<sup>+/+</sup> and EP1<sup>-/-</sup> mice. Scale bar: 100  $\mu$ m; representative pictures from n = 4/group.

(TIF)

**S5 Fig. EP1 expression in neurons, astrocytes, and microglia of the somatosensory cortex of EP1<sup>+/+</sup> and EP1<sup>-/-</sup> mice.** EP1 immunoreactivity (green) is co-localized with the neuronal marker Neun (red, A; arrows), but not with the astrocytic marker GFAP (red, B) or the microglial marker Iba1 (red, C) in EP1<sup>+/+</sup> mice. EP1 immunoreactivity is barely detected in EP1<sup>-/-</sup> mice (A-C). Scale bar: 100  $\mu$ m; representative pictures from n = 4/group.

(TIF)

**S1 Table. Physiological variables for Fig 1.**

(DOCX)

**S2 Table. Physiological variables for S1 Fig.**

(DOCX)

**S3 Table. Physiological variables for S2 Fig.**

(DOCX)

**S4 Table. Physiological variables for Fig 2.**

(DOCX)

**S5 Table. Physiological variables for Fig 4.**

(DOCX)

**S6 Table. Physiological variables for Table 1.**

(DOCX)

**S7 Table. Physiological variables for Fig 5.**

(DOCX)

## Acknowledgments

The generous support of the Feil Family Foundation is greatly acknowledged. The authors wish to thank Dr. Costantino Iadecola for his critical proofreading of the manuscript and Dr. Diane Lane for her advice of the statistical analysis.

## Author Contributions

**Conceptualization:** KU LP.

**Formal analysis:** KU KK JH NB YH PZ LP.

**Funding acquisition:** LP.

**Investigation:** KU KK JH NB YH LP.

**Methodology:** KU JH LP.

**Project administration:** LP.

**Resources:** PZ.

**Supervision:** LP.

**Validation:** KU LP.

**Visualization:** KU LP.

**Writing – original draft:** KU LP.

**Writing – review & editing:** KU KK JH NB YH PZ LP.

## References

1. Faraci FM, Heistad DD. Regulation of the cerebral circulation: role of endothelium and potassium channels. *Physiol Rev.* 1998; 78(1):53–97. Epub 1998/02/11. PMID: [9457169](#).
2. Dabertrand F, Nelson MT, Brayden JE. Acidosis dilates brain parenchymal arterioles by conversion of calcium waves to sparks to activate BK channels. *Circ Res.* 2012; 110(2):285–94. Epub 2011/11/19. doi: [10.1161/CIRCRESAHA.111.258145](#) PMID: [22095728](#); PubMed Central PMCID: [PMC3505882](#).
3. Kontos HA, Raper AJ, Patterson JL. Analysis of vasoactivity of local pH, PCO<sub>2</sub> and bicarbonate on pial vessels. *Stroke.* 1977; 8(3):358–60. PMID: [16363](#).
4. Iadecola C, Pelligrino DA, Moskowitz MA, Lassen NA. Nitric oxide synthase inhibition and cerebrovascular regulation. *J Cereb Blood Flow Metab.* 1994; 14(2):175–92. doi: [10.1038/jcbfm.1994.25](#) PMID: [7509338](#).
5. Quintana A, Raczka E, Quintana MA. Effects of indomethacin and diclofenac on cerebral blood flow in hypercapnic conscious rats. *Eur J Pharmacol.* 1988; 149(3):385–8. PMID: [3137081](#).
6. Niwa K, Haensel C, Ross ME, Iadecola C. Cyclooxygenase-1 participates in selected vasodilator responses of the cerebral circulation. *Circ Res.* 2001; 88(6):600–8. PMID: [11282894](#).
7. Feletou M, Huang Y, Vanhoutte PM. Endothelium-mediated control of vascular tone: COX-1 and COX-2 products. *Br J Pharmacol.* 2011; 164(3):894–912. doi: [10.1111/j.1476-5381.2011.01276.x](#) PMID: [21323907](#); PubMed Central PMCID: [PMC3195913](#).
8. Barnes JN, Schmidt JE, Nicholson WT, Joyner MJ. Cyclooxygenase inhibition abolishes age-related differences in cerebral vasodilator responses to hypercapnia. *J Appl Physiol (1985).* 2012; 112(11):1884–90. doi: [10.1152/jappphysiol.01270.2011](#) PMID: [22442028](#); PubMed Central PMCID: [PMC3379157](#).
9. Hristovska AM, Rasmussen LE, Hansen PB, Nielsen SS, Nusing RM, Narumiya S, et al. Prostaglandin E<sub>2</sub> induces vascular relaxation by E-prostanoid 4 receptor-mediated activation of endothelial nitric oxide synthase. *Hypertension.* 2007; 50(3):525–30. doi: [10.1161/HYPERTENSIONAHA.107.088948](#) PMID: [17635857](#).
10. Jadhav V, Jabre A, Lin SZ, Lee TJ. EP1- and EP3-receptors mediate prostaglandin E<sub>2</sub>-induced constriction of porcine large cerebral arteries. *J Cereb Blood Flow Metab.* 2004; 24(12):1305–16. doi: [10.1097/01.WCB.0000139446.61789.14](#) PMID: [15625406](#).
11. Narumiya S, Sugimoto Y, Ushikubi F. Prostanoid receptors: structures, properties, and functions. *Physiol Rev.* 1999; 79(4):1193–226. PMID: [10508233](#).
12. Jadhav V, Jabre A, Chen MF, Lee TJ. Presynaptic prostaglandin E<sub>2</sub> EP1-receptor facilitation of cerebral nitrenergic neurogenic vasodilation. *Stroke.* 2009; 40(1):261–9. doi: [10.1161/STROKEAHA.108.516104](#) PMID: [18948615](#).
13. Stock JL, Shinjo K, Burkhardt J, Roach M, Taniguchi K, Ishikawa T, et al. The prostaglandin E<sub>2</sub> EP1 receptor mediates pain perception and regulates blood pressure. *J Clin Invest.* 2001; 107(3):325–31. doi: [10.1172/JCI6749](#) PMID: [11160156](#); PubMed Central PMCID: [PMC199184](#).
14. Capone C, Faraco G, Anrather J, Zhou P, Iadecola C. Cyclooxygenase 1-derived prostaglandin E<sub>2</sub> and EP1 receptors are required for the cerebrovascular dysfunction induced by angiotensin II. *Hypertension.* 2010; 55(4):911–7. doi: [10.1161/HYPERTENSIONAHA.109.145813](#) PMID: [20194308](#); PubMed Central PMCID: [PMC2861995](#).
15. Kawano T, Anrather J, Zhou P, Park L, Wang G, Frys KA, et al. Prostaglandin E<sub>2</sub> EP1 receptors: downstream effectors of COX-2 neurotoxicity. *Nat Med.* 2006; 12(2):225–9. PMID: [16432513](#).

16. Park L, Wang G, Moore J, Girouard H, Zhou P, Anrather J, et al. The key role of transient receptor potential melastatin-2 channels in amyloid-beta-induced neurovascular dysfunction. *Nature communications*. 2014; 5:5318. doi: [10.1038/ncomms6318](https://doi.org/10.1038/ncomms6318) PMID: [25351853](https://pubmed.ncbi.nlm.nih.gov/25351853/).
17. Park L, Zhou J, Zhou P, Pistick R, El Jamal S, Younkin L, et al. Innate immunity receptor CD36 promotes cerebral amyloid angiopathy. *Proc Natl Acad Sci U S A*. 2013; 110(8):3089–94. Epub 2013/02/06. doi: [10.1073/pnas.1300021110](https://doi.org/10.1073/pnas.1300021110) PMID: [23382216](https://pubmed.ncbi.nlm.nih.gov/23382216/); PubMed Central PMCID: [PMC3581946](https://pubmed.ncbi.nlm.nih.gov/PMC3581946/).
18. Park L, Zhou P, Pistick R, Capone C, Anrather J, Norris EH, et al. Nox2-derived radicals contribute to neurovascular and behavioral dysfunction in mice overexpressing the amyloid precursor protein. *Proc Natl Acad Sci U S A*. 2008; 105(4):1347–52. Epub 2008/01/19. 0711568105 [pii] doi: [10.1073/pnas.0711568105](https://doi.org/10.1073/pnas.0711568105) PMID: [18202172](https://pubmed.ncbi.nlm.nih.gov/18202172/); PubMed Central PMCID: [PMC2234141](https://pubmed.ncbi.nlm.nih.gov/PMC2234141/).
19. Faraco G, Park L, Zhou P, Luo W, Paul SM, Anrather J, et al. Hypertension enhances Abeta-induced neurovascular dysfunction, promotes beta-secretase activity, and leads to amyloidogenic processing of APP. *J Cereb Blood Flow Metab*. 2015. doi: [10.1038/jcbfm.2015.79](https://doi.org/10.1038/jcbfm.2015.79) PMID: [25920959](https://pubmed.ncbi.nlm.nih.gov/25920959/).
20. Leffler CW, Busija DW, Armstead WM, Mirro R, Beasley DG. Ischemia alters cerebral vascular responses to hypercapnia and acetylcholine in piglets. *Pediatr Res*. 1989; 25(2):180–3. doi: [10.1203/00006450-198902000-00020](https://doi.org/10.1203/00006450-198902000-00020) PMID: [2919133](https://pubmed.ncbi.nlm.nih.gov/2919133/).
21. Wagerle LC, Degiulio PA. Indomethacin-sensitive CO2 reactivity of cerebral arterioles is restored by vasodilator prostaglandin. *Am J Physiol*. 1994; 266(4 Pt 2):H1332–8. PMID: [8184911](https://pubmed.ncbi.nlm.nih.gov/8184911/).
22. Wagerle LC, DeGiulio PA, Mishra OP, Delivoria-Papadopoulos M. Effect of dexamethasone on cerebral prostanoid formation and pial arteriolar reactivity to CO2 in newborn pigs. *Am J Physiol*. 1991; 260(4 Pt 2):H1313–8. PMID: [1901460](https://pubmed.ncbi.nlm.nih.gov/1901460/).
23. Hallinan EA, Hagen TJ, Husa RK, Tsymbalov S, Rao SN, vanHoeck JP, et al. N-substituted dibenzoxazepines as analgesic PGE2 antagonists. *J Med Chem*. 1993; 36(22):3293–9. PMID: [7901416](https://pubmed.ncbi.nlm.nih.gov/7901416/).
24. Park L, Anrather J, Forster C, Kazama K, Carlson GA, Iadecola C. Abeta-induced vascular oxidative stress and attenuation of functional hyperemia in mouse somatosensory cortex. *J Cereb Blood Flow Metab*. 2004; 24(3):334–42. PMID: [15091114](https://pubmed.ncbi.nlm.nih.gov/15091114/).
25. Dalkara T, Irikura K, Huang Z, Panahian N, Moskowitz MA. Cerebrovascular responses under controlled and monitored physiological conditions in the anesthetized mouse. *J Cereb Blood Flow Metab*. 1995; 15(4):631–8. doi: [10.1038/jcbfm.1995.79](https://doi.org/10.1038/jcbfm.1995.79) PMID: [7790412](https://pubmed.ncbi.nlm.nih.gov/7790412/).
26. Iadecola C. Does nitric oxide mediate the increases in cerebral blood flow elicited by hypercapnia? *Proc Natl Acad Sci U S A*. 1992; 89(9):3913–6. PMID: [1570313](https://pubmed.ncbi.nlm.nih.gov/1570313/); PubMed Central PMCID: [PMC525601](https://pubmed.ncbi.nlm.nih.gov/PMC525601/).
27. Park L, Anrather J, Girouard H, Zhou P, Iadecola C. Nox2-derived reactive oxygen species mediate neurovascular dysregulation in the aging mouse brain. *J Cereb Blood Flow Metab*. 2007; 27(12):1908–18. Epub 2007/04/13. doi: [10.1038/sj.jcbfm.9600491](https://doi.org/10.1038/sj.jcbfm.9600491) PMID: [17429347](https://pubmed.ncbi.nlm.nih.gov/17429347/).
28. Juteau H, Gareau Y, Labelle M, Sturino CF, Sawyer N, Tremblay N, et al. Structure-activity relationship of cinnamic acylsulfonamide analogues on the human EP3 prostanoid receptor. *Bioorg Med Chem*. 2001; 9(8):1977–84. PMID: [11504634](https://pubmed.ncbi.nlm.nih.gov/11504634/).
29. Bassil AK, Borman RA, Jarvie EM, McArthur-Wilson RJ, Thangiah R, Sung EZ, et al. Activation of prostaglandin EP receptors by lubiprostone in rat and human stomach and colon. *Br J Pharmacol*. 2008; 154(1):126–35. doi: [10.1038/bjp.2008.84](https://doi.org/10.1038/bjp.2008.84) PMID: [18332851](https://pubmed.ncbi.nlm.nih.gov/18332851/); PubMed Central PMCID: [PMC52438971](https://pubmed.ncbi.nlm.nih.gov/PMC52438971/).
30. Kabashima K, Saji T, Murata T, Nagamachi M, Matsuoka T, Segi E, et al. The prostaglandin receptor EP4 suppresses colitis, mucosal damage and CD4 cell activation in the gut. *J Clin Invest*. 2002; 109(7):883–93. doi: [10.1172/JCI14459](https://doi.org/10.1172/JCI14459) PMID: [11927615](https://pubmed.ncbi.nlm.nih.gov/11927615/); PubMed Central PMCID: [PMC52150928](https://pubmed.ncbi.nlm.nih.gov/PMC52150928/).
31. Niwa K, Araki E, Morham SG, Ross ME, Iadecola C. Cyclooxygenase-2 contributes to functional hyperemia in whisker-barrel cortex. *J Neurosci*. 2000; 20(2):763–70. PMID: [10632605](https://pubmed.ncbi.nlm.nih.gov/10632605/).
32. Wright DH, Abran D, Bhattacharya M, Hou X, Bernier SG, Bouayad A, et al. Prostanoid receptors: ontogeny and implications in vascular physiology. *Am J Physiol Regul Integr Comp Physiol*. 2001; 281(5):R1343–60. PMID: [11641101](https://pubmed.ncbi.nlm.nih.gov/11641101/).
33. Lindauer U, Vogt J, Schuh-Hofer S, Dreier JP, Dirnagl U. Cerebrovascular vasodilation to extraluminal acidosis occurs via combined activation of ATP-sensitive and Ca2+-activated potassium channels. *J Cereb Blood Flow Metab*. 2003; 23(10):1227–38. doi: [10.1097/01.WCB.0000088764.02615.B7](https://doi.org/10.1097/01.WCB.0000088764.02615.B7) PMID: [14526233](https://pubmed.ncbi.nlm.nih.gov/14526233/).
34. Simmons DL, Botting RM, Hla T. Cyclooxygenase isozymes: the biology of prostaglandin synthesis and inhibition. *Pharmacol Rev*. 2004; 56(3):387–437. doi: [10.1124/pr.56.3.3](https://doi.org/10.1124/pr.56.3.3) PMID: [15317910](https://pubmed.ncbi.nlm.nih.gov/15317910/).
35. Wang G, Sarkar P, Peterson JR, Anrather J, Pierce JP, Moore JM, et al. COX-1-derived PGE2 and PGE2 type 1 receptors are vital for angiotensin II-induced formation of reactive oxygen species and Ca

- (2+) influx in the subfornical organ. *Am J Physiol Heart Circ Physiol*. 2013; 305(10):H1451–61. doi: [10.1152/ajpheart.00238.2013](https://doi.org/10.1152/ajpheart.00238.2013) PMID: [24014678](https://pubmed.ncbi.nlm.nih.gov/24014678/); PubMed Central PMCID: [PMCPMC3840259](https://pubmed.ncbi.nlm.nih.gov/PMC3840259/).
36. Singh N, Ma B, Leonardo CC, Ahmad AS, Narumiya S, Dore S. Role of PGE(2) EP1 receptor in intracerebral hemorrhage-induced brain injury. *Neurotox Res*. 2013; 24(4):549–59. doi: [10.1007/s12640-013-9410-7](https://doi.org/10.1007/s12640-013-9410-7) PMID: [23824501](https://pubmed.ncbi.nlm.nih.gov/23824501/); PubMed Central PMCID: [PMCPMC3788039](https://pubmed.ncbi.nlm.nih.gov/PMC3788039/).
  37. Zhao X, Wu T, Chang CF, Wu H, Han X, Li Q, et al. Toxic role of prostaglandin E2 receptor EP1 after intracerebral hemorrhage in mice. *Brain Behav Immun*. 2015; 46:293–310. doi: [10.1016/j.bbi.2015.02.011](https://doi.org/10.1016/j.bbi.2015.02.011) PMID: [25697396](https://pubmed.ncbi.nlm.nih.gov/25697396/); PubMed Central PMCID: [PMCPMC4422065](https://pubmed.ncbi.nlm.nih.gov/PMC4422065/).
  38. Saleem S, Li RC, Wei G, Dore S. Effects of EP1 receptor on cerebral blood flow in the middle cerebral artery occlusion model of stroke in mice. *J Neurosci Res*. 2007; 85(11):2433–40. Epub 2007/06/30. doi: [10.1002/jnr.21399](https://doi.org/10.1002/jnr.21399) PMID: [17600836](https://pubmed.ncbi.nlm.nih.gov/17600836/); PubMed Central PMCID: [PMC2291148](https://pubmed.ncbi.nlm.nih.gov/PMC2291148/).
